# Supplementary material
Source: PubMed Central journal article supplement (PMC5628747)
Supplement: NIHMS864888-supplement-1.pdf [file NIHMS864888-supplement-1.pdf]

## Engineering the pre-metastatic niche

Brian A. Aguado<sup>1,2,#</sup>, Grace G. Bushnell<sup>3,#</sup>, Shreyas S. Rao<sup>4</sup>, Jacqueline S. Jeruss<sup>5,\*</sup>, and Lonnie D. Shea<sup>3,\*</sup>

### Affiliations:

<sup>1</sup>Department of Biomedical Engineering, Northwestern University, Evanston, IL 60208, USA

<sup>2</sup>Simpson Querrey Institute for BioNanotechnology, Northwestern University, Chicago, IL 60611, USA.

<sup>3</sup>Department of Biomedical Engineering, University of Michigan, Ann Arbor, MI 48105, USA

<sup>4</sup>Department of Chemical and Biological Engineering, University of Alabama, Tuscaloosa, AL 35487, USA

<sup>5</sup>Department of Surgery, University of Michigan, Ann Arbor, MI 48105, USA

#Denotes equal contribution

\* Correspondence should be address to L.D.S. (email: ldshea@umich.edu) or J.S.J. (email jjeruss@med.umich.edu)

### **CONTENTS:**

**Supplementary Table 1.** List of abbreviations and full names for surface markers/receptors, soluble factors, and transcription factors.

**Supplementary Table 1.** List of abbreviations and full names for surface markers/receptors, soluble factors, and transcription factors.

A. Surface markers/receptors

| <b>Abbreviation</b> | <b>Full name</b>                                 |
|---------------------|--------------------------------------------------|
| <b>CD105</b>        | cluster of differentiation 105                   |
| <b>CD106</b>        | cluster of differentiation 106                   |
| <b>CD11b</b>        | cluster of differentiation 11b                   |
| <b>CD14</b>         | cluster of differentiation 14                    |
| <b>CD34</b>         | cluster of differentiation 34                    |
| <b>CD44</b>         | cluster of differentiation 44                    |
| <b>CD45</b>         | cluster of differentiation 45                    |
| <b>CD73</b>         | cluster of differentiation 73                    |
| <b>EpCAM</b>        | Epithelial cell adhesion molecule                |
| <b>F4/80</b>        | adhesion G protein-coupled receptor E1           |
| <b>Gr-1</b>         | lymphocyte antigen 6 complex, locus G/C (Ly6G/C) |
| <b>Ly6C</b>         | lymphocyte antigen 6 complex                     |
| <b>Mac1</b>         | macrophage antigen 1                             |
| <b>TLR3</b>         | toll like receptor 3                             |
| <b>VEGFR1</b>       | vascular endothelial growth factor receptor 1    |
| <b>VLA-4</b>        | very late antigen 4                              |

## B. Soluble factors

| Abbreviation                  | Full name                             |
|-------------------------------|---------------------------------------|
| <b>BMP-2</b>                  | bone morphogenic protein 2            |
| <b>Bv8</b>                    | prokineticin 2                        |
| <b>CCL17</b>                  | chemokine (C-C motif) ligand 17       |
| <b>CCL2</b>                   | chemokine (C-C motif) ligand 2        |
| <b>CCL22</b>                  | chemokine (C-C motif) ligand 22       |
| <b>EPO</b>                    | erythropoietin                        |
| <b>G-CSF</b>                  | granulocyte colony stimulating factor |
| <b>IFN<math>\gamma</math></b> | interferon gamma                      |
| <b>IL-1</b>                   | interleukin 1                         |
| <b>IL-11</b>                  | interleukin 11                        |
| <b>IL-6</b>                   | interleukin 6                         |
| <b>IL-8</b>                   | interleukin 8                         |
| <b>MMP-1</b>                  | matrix metalloproteinase 1            |
| <b>S100A6</b>                 | S100 calcium binding protein A6       |
| <b>S100A8</b>                 | S100 calcium binding protein A8       |
| <b>S100A9</b>                 | S100 calcium binding protein A9       |
| <b>SDF-1</b>                  | stromal derived factor 1              |
| <b>TGF-<math>\beta</math></b> | transforming growth factor beta       |
| <b>TNF<math>\alpha</math></b> | tumor necrosis factor alpha           |
| <b>VEGF</b>                   | vascular endothelial growth factor    |

## C. Transcription factors

| Abbreviation  | Full name                                 |
|---------------|-------------------------------------------|
| <b>p16</b>    | cyclin-dependent kinase inhibitor 2A      |
| <b>p27</b>    | cyclin-dependent kinase inhibitor 1B      |
| <b>p38</b>    | p38 mitogen activated protein kinase      |
| <b>PRRX1</b>  | paired related homeobox 1                 |
| <b>SMAD-3</b> | mothers against decapentaplegic homolog 3 |
